# Supplementary material for: van der Waals 2D metallic materials for low-resistivity interconnects
Source: Royal Society of Chemistry journal article supplement (doi:10.1039/d1tc05872j), 2022-01-01
Supplement: d1tc05872j1.pdf [file d1tc05872j1.pdf]

Supplementary Information for

**Van der Waals 2D Metallic Materials for Low-Resistivity Interconnects**

Yaoqiao Hu, Patrick Conlin, Yeonghun Lee, Dongwook Kim, and Kyeongjae Cho

*Department of Materials Science and Engineering, The University of Texas at Dallas,*

*Richardson, Texas 75080, USA*

Corresponding Author: Kyeongjae Cho (kjcho@utdallas.edu)

**Table S1** Calculated figure of merit  $\rho\lambda$  ( $\times 10^{-16} \Omega\cdot\text{m}^2$ ), for 2D metallic TMDs comprised of various transition metals and chalcogen elements. Both 1T and 2H phases are considered and presented as 1T/2H. Materials with a  $\rho\lambda$  value higher than  $100 \times 10^{-16} \Omega\cdot\text{m}^2$  are considered semiconductors and denoted with a -.

|    | Ti        | Zr        | Hf        | V         | Nb        | Ta        | Mo     | W      | Re        | Pd        | Pt        |
|----|-----------|-----------|-----------|-----------|-----------|-----------|--------|--------|-----------|-----------|-----------|
| S  | 91.7/-    | -/-       | -/-       | 12.9/13.6 | 10.3/12.1 | 10.8/13.5 | 20.6/- | 17.6/- | 10.0/22.9 | -/99.3    | -/29.8    |
| Se | 29.8/-    | -/-       | -/-       | 11.9/13.7 | 11.7/13.4 | 12.0/13.5 | 30.9/- | 25.4/- | 10.9/23.9 | 18.4/19.7 | -/20.4    |
| Te | 17.1/56.0 | 27.5/86.0 | 32.1/97.6 | 13.2/13.9 | 12.3/15.2 | 11.6/14.5 | 75.3/- | 43.0/- | 12.4/16.5 | 18.1/26.5 | 25.9/20.1 |

**Table S2** Calculated figure of merit  $\rho\lambda$  ( $\times 10^{-16} \Omega\cdot\text{m}^2$ ), for 2D metallic  $M_2AX$  comprised of various transition metals and group 13/14 elements. Both carbides ( $X=C$ ) and nitrides ( $X=N$ ) are considered and presented as C/N.

|    | Ti        | V         | Zr        | Hf        | Ta        | Mo        | Cr        |
|----|-----------|-----------|-----------|-----------|-----------|-----------|-----------|
| Al | 11.5/13.8 | 9.68/9.59 | 11.4/12.9 | 10.9/12.1 | 9.24/19.4 | 8.09/6.84 | 7.45/8.38 |
| Si | 12.7/10.2 | 12.3/7.54 | 12.8/8.85 | 12.2/8.50 | 14.4/9.26 | 8.57/6.51 | 8.92/11.8 |
| Ge | 12.3/8.56 | 9.59/7.28 | 12.5/7.90 | 11.7/7.72 | 13.4/10.5 | 8.62/7.02 | 8.37/11.4 |
| Ga | 11.9/17.3 | 10.2/8.12 | 11.3/16.9 | 11.2/12.8 | 9.39/13.7 | 7.10/5.25 | 7.83/6.97 |
| In | 12.6/19.1 | 12.0/8.67 | 12.5/18.3 | 12.3/16.3 | 10.4/8.94 | 6.66/8.27 | 7.06/8.82 |
| Sn | 9.08/7.17 | 7.39/6.74 | 10.2/7.74 | 9.25/7.60 | 7.76/7.13 | 7.73/10.7 | 7.56/11.1 |

**Table S3** Calculated figure of merit  $\rho\lambda$  ( $\times 10^{-16} \Omega\cdot\text{m}^2$ ), for 2D metallic  $M_3AX_2$  comprised of various transition metals and group 13/14 elements. Both carbides ( $X=C$ ) and nitrides ( $X=N$ ) are considered and presented as C/N.

|    | Ti        | V         | Zr        | Hf        | Ta        | Mo        | Cr        |
|----|-----------|-----------|-----------|-----------|-----------|-----------|-----------|
| Al | 16.0/17.3 | 13.7/9.72 | 15.1/22.7 | 15.3/22.2 | 109/19.2  | 7.77/7.14 | 7.91/7.98 |
| Si | 17.2/29.0 | 11.8/8.32 | 14.6/18.4 | 13.5/17.2 | 21.8/15.3 | 8.90/5.92 | 8.05/9.79 |
| Ge | 17.4/17.6 | 9.39/8.37 | 15.3/16.8 | 14.2/15.9 | 15.5/11.9 | 8.34/9.62 | 8.22/11.4 |
| Ga | 14.7/17.1 | 12.7/9.37 | 14.5/20.4 | 14.6/20.2 | 91.1/8.97 | 8.34/7.65 | 7.63/8.28 |
| In | 17.0/16.7 | 12.1/10.5 | 15.7/22.1 | 15.9/21.8 | 94.6/8.79 | 8.40/12.4 | 7.52/10.9 |
| Sn | 17.0/13.4 | 9.33/8.29 | 16.5/18.1 | 16.4/17.7 | 13.3/8.86 | 8.81/18.0 | 9.17/17.8 |

**Table S4** Calculated figure of merit  $\rho\lambda$  ( $\times 10^{-16} \Omega\cdot\text{m}^2$ ), for 2D metallic  $M_4AX_3$  comprised of various transition metals and group 13/14 elements. Both carbides ( $X=C$ ) and nitrides ( $X=N$ ) are considered and presented as C/N.

|    | Ti        | V         | Zr        | Hf        | Ta        | Mo        | Cr        |
|----|-----------|-----------|-----------|-----------|-----------|-----------|-----------|
| Al | 20.1/102  | 21.6/9.58 | 20.6/42.0 | 21.1/31.3 | 19.3/12.8 | 9.83/6.50 | 10.0/11.0 |
| Si | 19.3/16.4 | 12.8/9.61 | 16.6/13.7 | 15.7/12.7 | 18.2/14.7 | 11.7/5.79 | 11.6/9.68 |
| Ge | 20.2/16.8 | 12.2/9.21 | 17.2/13.6 | 16.3/13.0 | 13.6/12.4 | 12.0/11.0 | 11.6/22.7 |
| Ga | 18.6/85.8 | 18.6/9.39 | 18.9/31.8 | 19.2/28.4 | 18.2/12.8 | 10.1/6.13 | 9.53/23.7 |
| In | 19.6/58.2 | 21.6/9.77 | 19.6/62.9 | 19.4/58.5 | 20.0/12.0 | 10.7/16.9 | 10.7/23.1 |

|    |           |           |           |           |           |           |           |
|----|-----------|-----------|-----------|-----------|-----------|-----------|-----------|
| Sn | 19.3/17.0 | 12.5/9.71 | 18.3/13.7 | 18.4/13.0 | 11.8/12.3 | 11.5/20.6 | 13.4/20.4 |
|----|-----------|-----------|-----------|-----------|-----------|-----------|-----------|

**Table S5** Calculated figure of merit  $\rho\lambda$  ( $\times 10^{-16} \Omega\cdot\text{m}^2$ ), for 2D metallic metal oxides MOX comprised of various transition metals and chalcogen elements/-OH group. Since MOX has a rhombohedral structure, we present their in-plane resistivities in two directions: [100]/[010].

|    | Ti        | V         | Cr        | Mn        | Fe        | Ce        | Gd        | U         | Np        | Pu        |
|----|-----------|-----------|-----------|-----------|-----------|-----------|-----------|-----------|-----------|-----------|
| F  | 43.0/9.08 | 16.0/9.50 | 10.6/13.4 | 11.3/10.2 | 21.9/8.66 | 23.4/14.3 | 51.1/25.2 | 18.5/9.34 | 2.6/17.6  | -         |
| Cl | 20.2/9.47 | 15.6/9.82 | 12.3/8.07 | 11.6/6.24 | 30.0/6.57 | 24.1/15.4 | -         | 22.8/9.61 | 15.4/9.29 | 11.1/11.1 |
| Br | 26.0/9.42 | 20.8/9.61 | 17.0/7.38 | 9.23/8.68 | 39.2/6.21 | 25.6/14.8 | -         | 18.7/9.56 | 15.6/9.35 | 8.64/8.45 |
| I  | 37.9/11.8 | 20.7/12.3 | 16.3/12.0 | 9.95/8.33 | 41.6/4.84 | 29.8/14.2 | -         | 14.4/9.34 | 19.6/9.28 | -         |
| OH | 33.0/6.20 | 10.6/6.26 | 8.28/8.86 | 12.0/6.14 | 22.2/6.26 | 13.0/8.29 | -         | 12.5/8.37 | 24.2/22.5 | 12.0/9.58 |

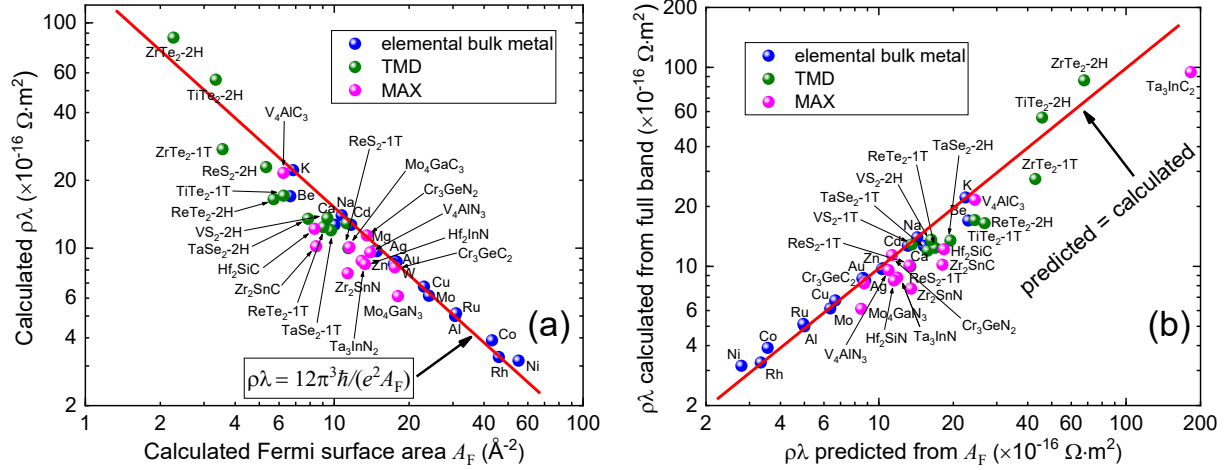

**Figure S1.** (a) Calculated  $\rho\lambda$  versus calculated Fermi surface area  $A_F$ . The data points closely follow the  $\rho\lambda = 12\pi^3\hbar/(e^2A_F)$  relationship, suggesting that  $\rho\lambda$  is determined by the Fermi surface area. (b) Parity plot comparing estimated  $\rho\lambda$  from Fermi surface area and calculated  $\rho\lambda$  from full electronic band structure. Data points closely follow the  $y = x$  line, showing that  $\rho\lambda$  can be well predicted from the Fermi surface area.

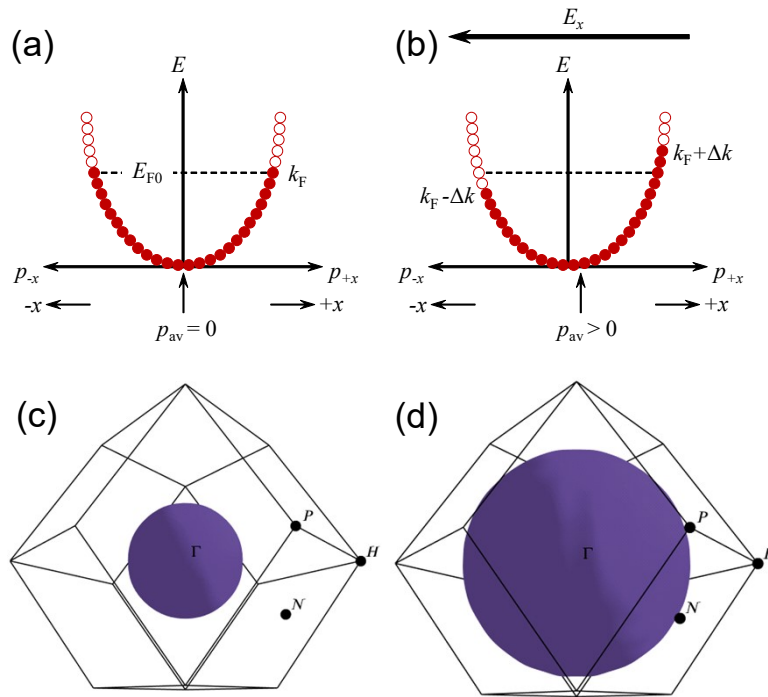

**Figure S2** (a) and (b) The occupation of electronic states based on the free electron model in the (a) absence of external field and (b) presence of external field. The figures show that current flow is due to the changes in the occupancy of electronic states near the Fermi energy. (c) and (d) The Fermi surface of elemental bulk metal potassium with (c) potassium valence  $\nu = 0.125$  and (d) potassium valence  $\nu = 1$ . Obviously, a higher valence means a higher valence electron density, which results in a larger Fermi volume and requires a larger Fermi surface area to enclose. The Brillouin zones are outlined by black lines. High symmetric  $k$ -points are also indicated.

**Table S6** The crystal structure, number of valence electrons per atom  $\nu$ , valence electron density  $n_v$  ( $\times 10^{22}$  cm $^{-3}$ ), Fermi surface area  $A_F$  predicted from  $n_v$ , calculated  $A_F$ ,  $\rho\lambda$  predicted from  $A_F$ , and calculated  $\rho\lambda$  from full band structure for elemental bulk metals and selected 2D metals.

| Metal            | Crystal structure | $\nu$ | $n_v$<br>( $\times 10^{22}$<br>cm $^{-3}$ ) | $A_F$<br>predicted<br>from $n_v$<br>( $\text{\AA}^{-2}$ ) | Calculated<br>$A_F$ ( $\text{\AA}^{-2}$ ) | $\rho\lambda$ predicted<br>from $A_F$<br>( $\times 10^{-16}$ $\Omega\cdot\text{m}^2$ ) | Calculated $\rho\lambda$<br>( $\times 10^{-16}$ $\Omega\cdot\text{m}^2$ ) |       |
|------------------|-------------------|-------|---------------------------------------------|-----------------------------------------------------------|-------------------------------------------|----------------------------------------------------------------------------------------|---------------------------------------------------------------------------|-------|
|                  |                   |       |                                             |                                                           |                                           |                                                                                        | [100]                                                                     | [001] |
| Cu               | fcc               | 1     | 8.49                                        | 23.23                                                     | 22.94                                     | 6.66                                                                                   | 6.75                                                                      | -     |
| Ag               | fcc               | 1     | 5.86                                        | 18.15                                                     | 17.66                                     | 8.66                                                                                   | 8.75                                                                      | -     |
| Al               | fcc               | 3     | 17.4                                        | 37.50                                                     | 30.60                                     | 5.00                                                                                   | 5.00                                                                      | -     |
| Au               | fcc               | 1     | 5.90                                        | 18.23                                                     | 17.82                                     | 8.58                                                                                   | 8.70                                                                      | -     |
| Ca               | fcc               | 2     | 4.63                                        | 15.50                                                     | 10.04                                     | 15.2                                                                                   | 12.7                                                                      | -     |
| Ni               | fcc               | 2     | 18.3                                        | 38.72                                                     | 55.03                                     | 2.78                                                                                   | 3.17                                                                      | -     |
| Rh               | fcc               | 2     | 14.5                                        | 33.21                                                     | 45.84                                     | 3.33                                                                                   | 3.29                                                                      | -     |
| Na               | bcc               | 1     | 2.55                                        | 10.42                                                     | 10.71                                     | 14.3                                                                                   | 14.0                                                                      | -     |
| K                | bcc               | 1     | 1.37                                        | 6.889                                                     | 6.839                                     | 22.4                                                                                   | 22.2                                                                      | -     |
| W                | bcc               | 2     | 12.6                                        | 30.30                                                     | 17.36                                     | 8.81                                                                                   | 8.50                                                                      | -     |
| Mo               | bcc               | 2     | 12.8                                        | 30.55                                                     | 24.02                                     | 6.36                                                                                   | 6.15                                                                      | -     |
| Be               | hcp               | 2     | 24.7                                        | 47.37                                                     | 6.656                                     | 23.0                                                                                   | 17.0                                                                      | 24.9  |
| Mg               | hcp               | 2     | 8.62                                        | 23.47                                                     | 14.66                                     | 10.4                                                                                   | 9.80                                                                      | 9.10  |
| Zn               | hcp               | 2     | 13.1                                        | 31.11                                                     | 14.85                                     | 10.3                                                                                   | 9.70                                                                      | 8.90  |
| Co               | hcp               | 2     | 18.1                                        | 38.49                                                     | 43.04                                     | 3.55                                                                                   | 3.90                                                                      | 2.44  |
| Cd               | hcp               | 2     | 9.31                                        | 24.71                                                     | 11.70                                     | 13.1                                                                                   | 12.7                                                                      | 12.7  |
| Ru               | hcp               | 2     | 14.4                                        | 33.07                                                     | 30.87                                     | 4.95                                                                                   | 5.14                                                                      | 3.91  |
| TiTe $_2$        | 1T                | -     | -                                           | -                                                         | 6.257                                     | 24.43                                                                                  | 17.1                                                                      | -     |
| VS $_2$          | 1T                | -     | -                                           | -                                                         | 11.22                                     | 13.62                                                                                  | 12.9                                                                      | -     |
| TaSe $_2$        | 1T                | -     | -                                           | -                                                         | 9.708                                     | 15.74                                                                                  | 12.0                                                                      | -     |
| ZrTe $_2$        | 1T                | -     | -                                           | -                                                         | 3.561                                     | 42.93                                                                                  | 27.5                                                                      | -     |
| ReS $_2$         | 1T                | -     | -                                           | -                                                         | 11.40                                     | 13.41                                                                                  | 10.0                                                                      | -     |
| ReTe $_2$        | 1T                | -     | -                                           | -                                                         | 9.048                                     | 16.89                                                                                  | 12.4                                                                      | -     |
| TiTe $_2$        | 2H                | -     | -                                           | -                                                         | 3.341                                     | 45.76                                                                                  | 56.0                                                                      | -     |
| VS $_2$          | 2H                | -     | -                                           | -                                                         | 9.382                                     | 16.29                                                                                  | 13.6                                                                      | -     |
| TaSe $_2$        | 2H                | -     | -                                           | -                                                         | 7.850                                     | 19.47                                                                                  | 13.5                                                                      | -     |
| ZrTe $_2$        | 2H                | -     | -                                           | -                                                         | 2.259                                     | 67.68                                                                                  | 86.0                                                                      | -     |
| ReS $_2$         | 2H                | -     | -                                           | -                                                         | 5.323                                     | 28.72                                                                                  | 22.9                                                                      | -     |
| ReTe $_2$        | 2H                | -     | -                                           | -                                                         | 5.706                                     | 26.79                                                                                  | 16.5                                                                      | -     |
| Zr $_2$ SnC      | hex.              | -     | -                                           | -                                                         | 11.32                                     | 13.50                                                                                  | 7.74                                                                      | -     |
| Ta $_3$ InC $_2$ | hex.              | -     | -                                           | -                                                         | 12.88                                     | 11.87                                                                                  | 8.79                                                                      | -     |
| Hf $_2$ SiC      | hex.              | -     | -                                           | -                                                         | 13.28                                     | 11.51                                                                                  | 8.50                                                                      | -     |
| Cr $_3$ GeC $_2$ | hex.              | -     | -                                           | -                                                         | 13.52                                     | 11.30                                                                                  | 11.4                                                                      | -     |
| V $_4$ AlC $_3$  | hex.              | -     | -                                           | -                                                         | 13.95                                     | 10.95                                                                                  | 9.58                                                                      | -     |
| Mo $_4$ GaC $_3$ | hex.              | -     | -                                           | -                                                         | 18.02                                     | 8.484                                                                                  | 6.13                                                                      | -     |

|                                  |       |   |   |   |       |       |      |   |
|----------------------------------|-------|---|---|---|-------|-------|------|---|
| Zr <sub>2</sub> SnN              | hex.  | - | - | - | 8.459 | 18.07 | 10.2 | - |
| Ta <sub>3</sub> InN <sub>2</sub> | hex.  | - | - | - | 0.837 | 182.6 | 94.6 | - |
| Hf <sub>2</sub> SiN              | hex.  | - | - | - | 8.340 | 18.33 | 12.2 | - |
| Cr <sub>3</sub> GeN <sub>2</sub> | hex.  | - | - | - | 17.53 | 8.721 | 8.22 | - |
| V <sub>4</sub> AlN <sub>3</sub>  | hex.  | - | - | - | 6.249 | 24.46 | 21.6 | - |
| Mo <sub>4</sub> GaN <sub>3</sub> | hex.  | - | - | - | 11.50 | 13.29 | 10.1 | - |
| TiOOH                            | orth. | - | - | - | 9.766 | 15.65 | 33.0 | - |
| FeOI                             | orth. | - | - | - | 11.96 | 12.78 | 41.6 | - |
| CeOF                             | orth. | - | - | - | 9.903 | 15.43 | 23.4 | - |
| MnOCl                            | orth. | - | - | - | 14.16 | 10.79 | 11.6 | - |
| NpOBr                            | orth. | - | - | - | 8.166 | 18.72 | 15.6 | - |

Note: In the crystal structure column, we use the following abbreviation. fcc: face-centred cubic, bcc: body-centred cubic, hcp: hexagonal closed packed; 1T: trigonal and 2H: hexagonal are two common phases of TMDs; hex.: hexagonal, orth.: orthorhombic.

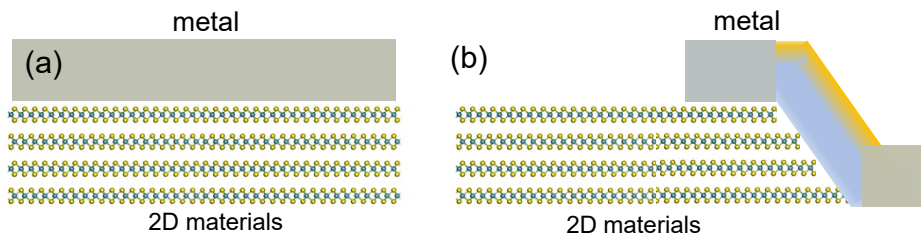

Figure S3. Schematics of metal contact to 2D materials: (a) top contact, (b) edge contact
